1 **DNA methylation profiles in urothelial bladder cancer tissues and children with**  
2 **schistosomiasis from Eggua, Ogun State, Nigeria**

3 **Short title: DNA methylation in bladder cancer and childhood schistosomiasis**

4 Cephas A. Akpabio<sup>1</sup>, Rachael P. Ebu<sup>1</sup>, Oluwaseun E. Fatunla<sup>2</sup>, Henrietta O. Awobode<sup>3</sup>,  
5 Chiaka I. Anumudu<sup>4\*</sup>

6 <sup>1</sup>Cell Biology and Genetics Unit, Department of Zoology, University of Ibadan, Ibadan,  
7 Nigeria

8 <sup>2</sup>Department of Pathology, University College Hospital, University of Ibadan, Ibadan,  
9 Nigeria

10 <sup>3</sup>Parasitology Unit, Department of Zoology, University of Ibadan, Ibadan, Nigeria

11 <sup>4</sup>Cellular Parasitology Programme, Department of Zoology, University of Ibadan, Ibadan,  
12 Nigeria

13 \*Corresponding author: Tel: +2348023590478; e-mail: [cianumudu@yahoo.com](mailto:cianumudu@yahoo.com)

14 **Acknowledgements**

15 We appreciate the Adele of Ijoun, staff of the primary health care centre in Ijoun and the  
16 headteachers of the various schools we obtained samples from.

17 **Abstract:** Squamous cell carcinoma has been attributed to chronic schistosomiasis and is the  
18 predominant type of bladder cancer in schistosomiasis endemic areas. The aim of this study  
19 was to assess early promoter DNA methylation in selected genes implicated in schistosomiasis-  
20 associated bladder cancer (SABC). A total of 161 urine samples were collected from school  
21 aged children in Eggua Community of Ogun State and examined by microscopy for  
22 *Schistosoma haematobium* eggs. From this sample, a subset of 34(21.1%) urine samples  
23 positive for *S. haematobium* eggs and 22 formalin fixed paraffin-embedded bladder cancer

24 tissues obtained from the University College Hospital Ibadan, were subjected to DNA isolation  
25 and bisulfite DNA conversion. Quantitative methylation specific PCR was used to determine  
26 the methylation status of *APC*, *RAR $\beta$ 2*, *RASSF1A* and *TIMP3* in the samples. Methylation in  
27 *APC*, *RAR $\beta$ 2*, *RASSF1A* and *TIMP3* was observed in 24(70.6%), 18(52.9%), 15(44.1%) and  
28 8(23.5%) of the positive urine samples respectively and in 7(31.8%), 13(59.1%), 17(77.3%)  
29 and 8(36.4%) of bladder cancer tissues respectively. *APC*, *RAR $\beta$ 2* and *RASSF1A* were 5-fold,  
30 2-fold and 27-fold downregulated respectively in positive urine samples and 9-fold, 3-fold and  
31 15-fold downregulated respectively in the bladder cancer tissues. The odds of promoter  
32 methylation in *RAR $\beta$ 2* (OR: 1.133) were likely even with light infection. Gene promoter DNA  
33 methylation in tumour suppressor genes was observed in schistosomiasis cases. Hence, DNA  
34 methylation may occur during active *Schistosoma haematobium* in children. This result may  
35 serve as an early non-invasive biomarker to detect and hint at the risk of developing SABC  
36 later in life.

37

38 **Author summary:** *Schistosoma haematobium* can survive in the host for more than 20 years,  
39 during which time it causes damage to the bladder tissues and sometimes with no symptoms.  
40 Immune response to the parasite infection is inflammatory and leads to several morbidities  
41 like anaemia, undernutrition, dysuria, and female genital sores and may result in malignant  
42 transformation (schistosomiasis-associated bladder cancer) which presents in later years.  
43 Children are more susceptible to schistosomiasis because of having a naive immune system,  
44 making them targets for these morbidities, and including the possibility of developing bladder  
45 cancer in later years. DNA methylation which is often the first step in malignant  
46 transformation is known to be induced by inflammation during chronic schistosomiasis.  
47 Hence, assessing DNA methylation can serve as a biomarker for predicting the risk of  
48 developing bladder cancer later in life. In this study, we have established that DNA  
49 methylation occurs during childhood schistosomiasis and represents the time when events  
50 leading up to malignant transformation may begin. We suggest that once there is a  
51 schistosomiasis infection, DNA methylation will occur and unless the disease is treated on  
52 time, the individual is at risk of malignant transformation later in life.

53

## 54 **Introduction**

### 55 **Schistosomiasis**

56 Schistosomiasis is a neglected tropical disease (NTD) that is endemic in sub-Saharan Africa,  
57 Middle East and Asia [1]. It is a water-borne disease caused by species of the genus  
58 *Schistosoma*. The species that are endemic to Africa are *S. haematobium* and *S. mansoni*  
59 which cause urogenital schistosomiasis and intestinal schistosomiasis respectively.  
60 Individuals get infected through contact with water bodies that have been contaminated with  
61 infective larval stage (cercaria) of the parasite. Data from the World Health Organization [2],  
62 show that schistosomiasis is present in 78 countries, and it is estimated that at least 90% of  
63 people requiring treatment for schistosomiasis reside in Africa. It has been estimated that  
64 over 700 million people worldwide in endemic regions are at risk of infection, with over 200  
65 000 deaths annually [3].

66 The host immune response to the various stages of the life cycle of *Schistosoma*  
67 *haematobium* is inflammatory in nature. The consequence of the inflammatory response is  
68 granulomatous formation around eggs lodged in the tissues of the bladder. The granulomata  
69 usually conjugate, forming tubercles and nodules that often ulcerate [4]. In chronic  
70 schistosomiasis, this leads to several morbidities such as anaemia, undernutrition, dysuria and  
71 female genital sores [5]; and may result in malignant transformation (squamous cell  
72 carcinoma) which usually presents at a late stage [6].

73 In addition, lesions due to schistosomiasis are assumed to play a part in intensifying the  
74 exposure of the bladder epithelium to mutagenic substrates from tobacco or other known  
75 toxic chemicals. Although the mechanisms underlying the link between schistosomiasis and  
76 bladder cancer are still debatable, available data shows that schistosomiasis induces DNA  
77 methylation via chronic inflammation. DNA methylation is known to be involved in  
78 numerous cancer phenotypes.

## 79 **Schistosomiasis-induced DNA Methylation and Bladder Cancer**

80 DNA methylation is the most studied epigenetic modification and is the process in which a  
81 methyl group forms a covalent bond with 5' position of a cytosine ring forming 5-  
82 methylcytosine (5mC). This event usually occurs in CG rich regions called CpG islands.  
83 These are regions that have more cytosines followed by guanines than other nucleotides. CpG  
84 islands are upstream, and make the bulk of gene promoter regions, in addition to playing  
85 crucial roles in gene expression. Methylated promoter regions recruit other methylation  
86 enzymes, thereby making access by transcription factors more difficult. Naturally, the process  
87 of DNA methylation is carried out by a group of DNA methyltransferase enzymes (DNMTs)  
88 namely; DNMT3a and DNMT3b and DNMT1 [7]. The former group is responsible for *de*  
89 *novo* DNA methylation during embryonic development, while DNMT1 maintains the  
90 methylation in subsequent cell division using hemimethylated strands [8]. This allows for  
91 normal gene regulation and expression.

92 In contrast, DNA methylation patterns can be altered directly or indirectly by disease causing  
93 pathogens (bacteria, parasites and viruses) [9] or chemical agents like amines, tobacco and  
94 arsenic. This has debilitating effects on gene expression and function; thus, impacting disease  
95 progression including cancer and resistance to therapy. Aberrant DNA methylation (hyper-  
96 and hypomethylation) has been associated with numerous diseases including cancer. Many  
97 cancerous cells are characterized by different abnormal DNA methylation patterns, which are  
98 usually distinct and can be used to discriminate between cancerous and normal cells.

99 Chronic schistosomiasis which synchronizes with chronic inflammation occurs during active  
100 infection in children and peaks at late adolescence [10]. It has also been established that  
101 chronic inflammation elicits aberrant DNA methylation, and that the latter is believed to  
102 constitute the initiation phase in cancer development. Based on these observations, it can be  
103 suggested that early events (DNA methylation) leading up to SABC may occur in children

104 with active schistosomiasis infection. Therefore, assessing DNA methylation patterns in  
105 infected children may aid in the identification of individuals who may be at risk of  
106 developing SABC later in life, and provide the basis for early intervention.

107 Schistosomiasis Associated Bladder Cancer (SABC) has not been documented in Eggua,  
108 southwest Nigeria, but Onile *et al.* [11] reported that about 62% of bladder pathologies,  
109 detected by ultrasonography were associated with chronic schistosomiasis, suggesting altered  
110 DNA methylation patterns would have occurred. In addition there are reports of cancer-  
111 specific DNA methylation alterations in pre-diagnostic blood collected more than 10 years  
112 before diagnosis of chronic lymphocytic leukemia [12]. Based on these reports and the fact  
113 that children are more susceptible to *Schistosoma haematobium* infection, it can be suggested  
114 that epigenetic changes begin early in children during active infections. Thus, they are  
115 hotspots for events leading up to disease progression, bladder pathologies and risk of  
116 developing schistosomiasis associated bladder cancer later in life.

### 117 **DNA Methylation as biomarker for SABC**

118 The gold standard for treatment of bladder cancer is cystoscopy. It is invasive, painful and less  
119 effective for SABC. DNA methylation biomarkers have been widely used for early diagnosis,  
120 prognosis and prediction of diseases including cancer. These biomarkers are easily (not  
121 invasive and not painful) obtainable from body fluids. Different DNA methylation  
122 biomarkers have been assessed for detection, prognosis and treatment of SABC which  
123 usually present late [6]. It is known that the best form of treatment is prevention, and that  
124 DNA methylation events (which are reversible) can occur years before diagnosis of  
125 neoplasm, hence it is pertinent to assess these events at its earliest onset. Therefore, the use of  
126 non-invasive DNA methylation biomarkers to identify early events in childhood  
127 schistosomiasis, which precede SABC later in life, may help speed up intervention measures  
128 and treatments to children with chronic infections and at risk of malignant transformation.

129 This is the first attempt to evaluate DNA methylation induced my *S. haematobium* infection  
130 in children. We also look to establish a possible link between *S. haematobium* infection  
131 especially in children and SABC. This study will contribute additional knowledge to the  
132 understanding of epigenetic changes occurring in schistosomiasis that may predispose the  
133 infected individuals, especially during childhood to the risk of developing SABC. Evaluation  
134 of the methylation status will help to determine which urine biomarkers can be used, and are  
135 effective in hinting at the risk of developing SABC.

136 This study is aimed at evaluating promoter DNA methylation, as an early non-invasive  
137 potential biomarker in children infected with *Schistosoma haematobium* in Eggua  
138 Community, and how it can be used to hint on, and identify individuals at risk of developing  
139 schistosomiasis-associated bladder cancer later in life. We have been able to establish that  
140 during childhood schistosomiasis, DNA methylation is induced especially in tumour  
141 suppressor genes. Therefore, once there is schistosomiasis infection and the disease is left  
142 untreated, the individual is at risk of developing schistosomiasis-associated bladder cancer  
143 later in life.

144

## 145 **Materials and Methods**

### 146 **Study design**

147 For this study, a cross sectional design was used to collect urine samples once from voluntary  
148 participants who were all school aged children. A total of 161 participants between the ages  
149 of 5 and 16 years were recruited from Eggua Community, using informed consent  
150 procedures. A total of 22 Formalin fixed paraffin-embedded bladder cancer tissue blocks  
151 (SABC and Non-SABC) were collected from the cancer registry of the University College  
152 Hospital (UCH), University of Ibadan. The cancer tissue blocks were analysed by a  
153 Histopathologist from the University College Hospital (UCH), University of Ibadan, to  
154 ascertain they were bladder cancer tissues and histological type.

### 155 **Ethical Approval**

156 Ethical clearance was obtained from the UI/UCH Health Research Ethics Committee, College  
157 of Medicine, University of Ibadan (IRB number: UI/UCH/22/0036). Using informed consent  
158 procedures, the assent and consent of the children and their parents/guardians respectively  
159 were obtained in writing before sampling was carried out.

### 160 **Study Area**

161 Eggua is a rural agricultural community (07°01.592 N; 002°55.083 E) in Yewa North Local  
162 Government Area, Ogun State Nigeria. The main sources of water in the area are flowing  
163 Rivers, especially River Yewa, which are used for domestic purposes, including drinking,  
164 washing and cooking in addition to fishing and swimming. Schistosomiasis is known to be  
165 prevalent in this community [13] and bladder pathologies associated with Schistosomiasis has  
166 been reported as well [11].

167



## 168 **Study Population**

169 The study population was drawn from school aged children living in the study area. Urine  
170 samples from participants positive for schistosoma eggs and the cancer tissue blocks were  
171 used as cases while samples from participants without haematuria or schistosoma eggs  
172 detected in urine samples were used as controls.

## 173 **Sample Size Determination**

174 This was determined according to Charan and Biswas, [14]; and calculated using the formula;

$$175 \text{ Sample size} = \frac{r + 1(p^*)(1 - p^*)(Z_{\beta} + Z_{\beta/2})^2}{(p_1 - p_2)^2}$$

176 Values for proportions were obtained based on the number of cases and control from a  
177 previous study, [15]. Thus number of cases = 57, number of control = 13,  $r = 0.23$ , expected  
178 proportion in cases ( $p_1$ ) = 0.81, expected proportion in control ( $p_2$ ) = 0.19,  $Z_{\beta} = 1.28$ ,  $Z_{\beta/2} =$   
179 1.96,  $p^* = 0.5$ .

180 Therefore, samples from at least 37 participants were used in this study.

## 181 **Biological Sample collection and analysis**

182 20ml of voided urine were collected from each participant in reagent bottles. Urinalysis  
183 reagent strips (Rapid Labs, UK) were used for rapid detection of blood and analytes,  
184 including glucose, ketone, specific gravity, pH, proteinuria and leukocytes in the urine  
185 samples, following the manufacturer's instructions. Samples were immediately centrifuged at  
186 3000  $g$  for 10 minutes and the sediments were carefully examined by microscopy for  
187 presence of *Schistosoma* eggs. Urine samples were then stored at  $-30^{\circ}\text{C}$  until DNA  
188 extraction was carried out. Tissue blocks of formalin fixed paraffin-embedded specimens of  
189 *Schistosoma*-associated bladder cancer and Urothelial bladder cancer were obtained from the

190 bladder cancer registry of UCH, University of Ibadan. Genomic DNA was extracted from  
191 them.

### 192 **Gene Selection for Promoter Methylation**

193 Four genes (*APC*, *RARβ2*, *RASSF1A* and *TIMP3*) associated with schistosomiasis induced  
194 bladder pathology and cancers were selected from literature for analysis of methylation  
195 abnormalities. These genes have been shown to be highly sensitive as biomarkers for bladder  
196 cancer. *RASSF1A*, *APC* and *RARβ2* are all tumour suppressor genes while *TIMP3* plays a key  
197 role in activating apoptotic cascade.

### 198 **Primer Design for *APC*, *RARβ2*, *RASSF1A* and *TIMP3***

199 The gene ID and organism of the target genes were obtained from the National Centre for  
200 Biotechnology Information (NCBI) database. This was then used to search for the promoter  
201 region of the gene in the Eukaryotic Promoter Database (EPD). The sequence of the promoter  
202 region for each target gene was then retrieved from the database using the sequence retrieval  
203 tool. A blast run for the promoter sequence was carried out using the NCBI blast tool in order  
204 to determine specificity of the promoter sequence. Primer design specific for methylation  
205 assay was then carried out using MethPrimer as previously reported [16].

### 206 **Genomic DNA Extraction from bladder cancer tissues and urine samples**

207 For genomic DNA extraction, four tissue sections ( $\leq 20 \mu\text{m}$  thick) were obtained from each  
208 bladder cancer tissue block, using a microtome and transferred to 1.5 ml microcentrifuge  
209 tubes for deparaffinization.

210 **Deparaffinization of tissue sections and DNA extraction:** This was carried out using the  
211 Zymo Research Quick-DNA FFPE kit, following the manufacturer's instructions. Briefly,  
212 400 $\mu\text{L}$  of Deparaffinization solution was added to 1.5ml microcentrifuge tubes, incubated at  
213 55°C for 1 minute and thereafter vortexed briefly. Deparaffinization solution was then

214 discarded. Deparaffinized tissue digested using Proteinase K, dH<sub>2</sub>O and 2X digestion buffer.  
215 This was incubated at 55°C overnight for 12-16 hours. DNA was purified and eluted with  
216 70µL of DNA Elution Buffer. Purified DNA was then stored at ≤-20°C for further use.

217 **DNA Isolation from urine samples:** 34 urine samples positive for Schistosoma eggs were  
218 used for DNA extraction. DNA was also extracted from 16 urine samples that were  
219 microscopically negative for Schistosoma eggs and this served as control. This was done  
220 using the Geneaid gDNA Microkit, following the manufacturer's instructions. Briefly, 1ml of  
221 urine was transferred to a 1.5ml microcentrifuge tube and centrifuged at 6000xg for 2  
222 minutes and the supernatant discarded. This was resuspended using 500µL of elution buffer,  
223 centrifuged at 600xg for 1 minute and the supernatant discarded. Cells were lysed with  
224 200µL of S1 buffer and 20µL of Proteinase K and incubated at 60°C for 30 minutes. Further  
225 lysis was done with 200µL of S2 buffer and incubated at 60°C for 20 minutes. DNA was  
226 bound using 200µL of absolute ethanol, washed and eluted with 60µL of DNA elution buffer.  
227 Eluted DNA was stored at ≤-20°C for further use.

#### 228 **Bisulfite Treatment of Isolated DNA**

229 DNA extracted from urine samples and paraffinized tissue were subjected to bisulfite  
230 treatment, which converts unmethylated cytosine residues to uracil residues, leaving the  
231 methylated cytosines as previously reported [17]. Briefly, 50µL of genomic DNA from each  
232 sample were denatured using 2µl of freshly prepared NaOH (final concentration, 3M) and  
233 incubated 37°C for 10 minutes. The denatured DNA was then mixed with freshly prepared  
234 sodium bisulfite solution (final concentration, 5M), covered with mineral oil and incubated in  
235 the dark at 50°C for 16 hours. The heavy mineral oil was carefully separated from the  
236 reaction solution and the bisulfite-modified DNA were purified using GenepHlow Gel/PCR  
237 purification kit, following manufacturer's instructions. Modified DNA was then stored at –  
238 80 °C.

## 239 **Real Time Quantitative Methylation Specific PCR (qMSP) for Bisulfite Converted DNA**

240 The qMSP were conducted for each bisulfite-modified DNA on Applied Systems Bio Rad  
241 iQ5 Thermocycler. Amplification was carried out in a 25 $\mu$ l total reaction volume containing  
242 4 $\mu$ l of master mix (5x HOT FIREPol EvaGreen qPCR Supermix), 0.4 $\mu$ l each of forward and  
243 reverse primers for each gene (*APC*, *RAR $\beta$ 2*, *RASSF1A* and *TIMP3*), 18.2 $\mu$ l of nuclease free  
244 water and 2 $\mu$ l of modified DNA. Amplification reaction conditions were as follows; hot start  
245 at 95°C for 5 minutes, subsequent denaturation at 95°C for 15 minutes, annealing at 48 -  
246 49°C for 15 minutes, extension at 72°C for 20 minutes final extension step at 55°C for 10  
247 minutes. This was carried out for 40 cycles. Amplification was carried out for methylated and  
248 unmethylated primers of each gene separately. Melt curves were also generated for each  
249 reaction. No template control (NTC) was used as negative control. Level of CpG island  
250 methylation for promoter region of each gene was obtained among three categories of  
251 samples i.e. infection only (urogenital schistosomiasis alone), bladder cancer and controls (no  
252 infection/urogenital schistosomiasis). Primer sequences, their parameters and qMSP  
253 conditions are shown in supplementary data S1 Table.

## 254 **Interpretation and Data Analysis for qMSP**

255 Average melt temperature was used to ascertain actual amplified product for each primer.  
256 Relative quantification normalized against unit mass (number of samples) was used to  
257 determine fold change with the control sample as the calibrator. This was determined using;  
258  $\text{Ratio}_{(\text{test/calibrator})} = 2^{\Delta\text{Ct}}$ . Where  $\Delta\text{Ct} = \text{Ct}(\text{calibrator}) - \text{Ct}(\text{test})$ .

## 259 **Statistical Analysis**

260 All statistical analysis was done using SPSS version 20. Pearson's Chi Square test was used  
261 to test association between promoter region methylation of each gene with age, gender and  
262 cancer histological type. Odds ratio was used to predict the risk of promoter methylation in  
263 relation to the intensity of infection. Receiver Operating Curve (ROC) analysis was used to

264 assess promoter region hypermethylation of the selected genes to distinguish between cases  
265 and controls.

266

## 267 **Results**

268 A total of 161 school aged children participated in this study. Out of this, 78(48.5%) were  
269 males while 83(51.5%) were females, with a mean age of 10.7 years (Table 1). A total of 34  
270 urine samples were positive for *Schistosoma haematobium* (*Sh*) eggs after microscopic  
271 examination for a prevalence of 21.1%. Of this, light infection (<50 eggs/10mL of urine)  
272 occurred in 32(94.1%) samples, while heavy infection ( $\geq$ 50 eggs/10mL of urine) was seen in  
273 2(5.9%) samples. Urinalysis showed that 33(20.5%) of the participants had haematuria, out of  
274 which 11(33.3%) were positive for *S. haematobium* infection (Table 1). Equal number (17) of  
275 males (21.8%) and females (20.5%) had *S. haematobium* infection (Table 1).

276 A total of 50 urine samples were then subjected to further analysis of DNA methylation; 34  
277 were positive for *Schistosoma haematobium* (*Sh*) eggs and 16 negative for both *S.*  
278 *haematobium* eggs and haematuria and thus, served as controls.

279 Archived FFPE bladder cancer tissues composed 12(54.6%) males while females were  
280 5(22.7%) with an average age of 55.8 years. More males (54.6%) than females (22.7%) had  
281 bladder cancer (Table 1). Urothelial carcinoma was the most common type of tumour,  
282 constituting 59.1% of the samples (Table 1).

283

284 **Table 1: Demographic Characteristics of Participants and Bladder Cancer Tissues**

| Parameters                    | Number          |                  | Total (%)        |
|-------------------------------|-----------------|------------------|------------------|
|                               | Infected (%)    | Uninfected(%)    |                  |
| <b>Participants</b>           |                 |                  |                  |
| <b>Sex</b>                    |                 |                  |                  |
| Male                          | 17(21.8)        | 61(78.2)         | 78(48.5)         |
| Female                        | 17(20.5)        | 66(79.5)         | 83(51.5)         |
| <b>Total</b>                  | <b>34(21.1)</b> | <b>127(78.9)</b> | <b>161(100)</b>  |
| <b>Age Group</b>              |                 |                  |                  |
| 5 – 10                        | 13(22.4)        | 45(77.6)         | 58(36.0)         |
| 11 – 16                       | 21(20.8)        | 80(79.2)         | 101(62.7)        |
| Missing data                  | 0(0)            | 2(100)           | 2(1.2)           |
| <b>Total</b>                  | <b>34(21.1)</b> | <b>125(77.6)</b> | <b>161(98.7)</b> |
| <b>Haematuria</b>             |                 |                  |                  |
| Yes                           | 11(33.3)        | 22(66.7)         | 33(20.5)         |
| No                            | 23(18.0)        | 105(82.0)        | 128(79.5)        |
| <b>Total</b>                  | <b>34(21.1)</b> | <b>127(78.9)</b> | <b>161(100)</b>  |
| <b>Bladder Cancer Tissues</b> |                 |                  |                  |
| <b>Sex</b>                    |                 |                  |                  |
| Male                          |                 |                  | 12(54.6)         |
| Female                        |                 |                  | 5(22.7)          |
| Missing data                  |                 |                  | 5(22.7)          |
| <b>Total</b>                  |                 |                  | <b>22(100)</b>   |
| <b>Age Group</b>              |                 |                  |                  |
| <55                           |                 |                  | 7(31.8)          |
| ≥55                           |                 |                  | 9(40.9)          |
| Missing data                  |                 |                  | 6(27.3)          |
| <b>Total</b>                  |                 |                  | <b>22(100)</b>   |
| <b>Tumor Type</b>             |                 |                  |                  |
| UC                            |                 |                  | 13(59.1)         |
| Invasive UC                   |                 |                  | 3(13.6)          |
| Papillary UC                  |                 |                  | 1(4.6)           |
| Invasive Papillary UC         |                 |                  | 2(9.1)           |
| Invasive SCC                  |                 |                  | 2(9.1)           |
| Invasive Adenocarcinoma       |                 |                  | 1(4.6)           |
| <b>Total</b>                  |                 |                  | <b>22(100)</b>   |

321

322

### 323 Gene Promoter Methylation of the Target Genes in Schistosomiasis and Bladder Cancer

324 Gene promoter methylation of the target genes was assayed using a total 56 samples (34 *Sh*  
325 positive urine and 22 bladder cancer tissues). Promoter methylation in the following genes,  
326 *APC*, *RAR $\beta$ 2*, *RASSF1A* and *TIMP3* were evaluated. *RASSF1A* was methylated in more  
327 (32(57.1%) of all the samples, while *TIMP3* was the least methylated in 16(28.6%) of  
328 samples (Table 2). Figure 1 shows the images of the qPCR amplification cycle and melting  
329 temperatures for *APC* gene. The images of the qPCR amplification cycle and melting  
330 temperatures for *RAR $\beta$ 2*, *RASSF1A* and *TIMP3* are shown in appendix figures I, II, and III  
331 respectively.

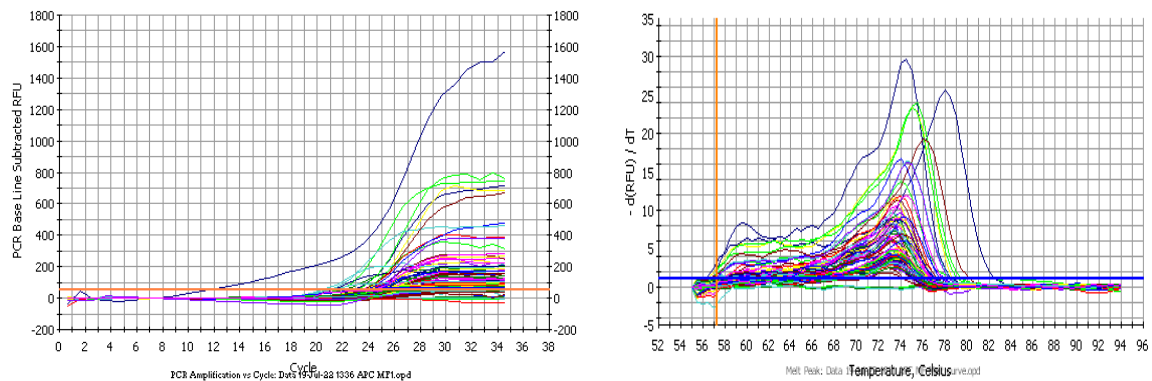

332

A

B

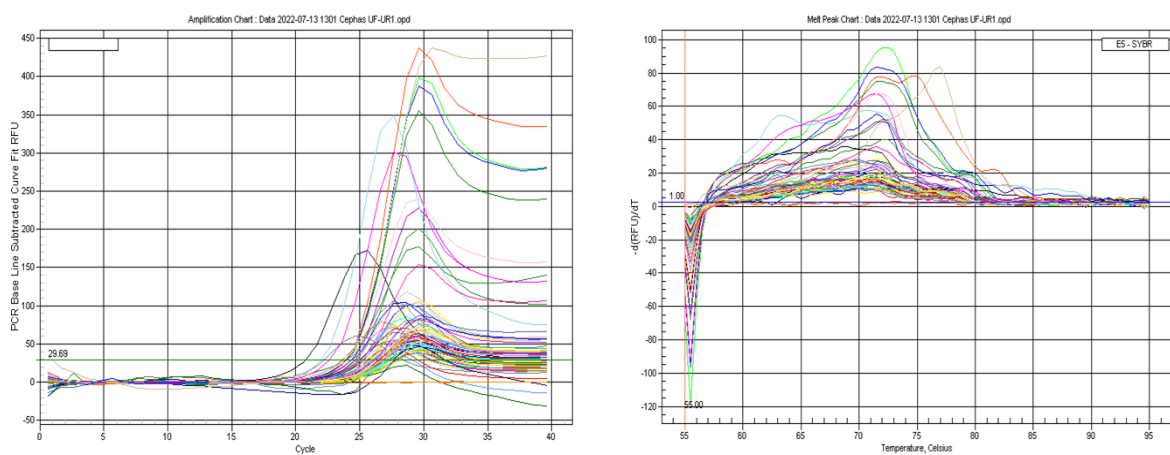

334

C

D

335 **Fig 1: qPCR amplification and melting temperatures for *APC*:** A) qPCR amplification cycle for  
336 methylation reaction; B) Melting temperature for methylation reaction; C) qPCR amplification cycle  
337 for unmethylation reaction; D) Melting temperature for unmethylation reaction  
338

339 In comparing both bladder cancer tissues and positive urine samples, there were more  
 340 promoter methylation in *APC* (24) and *RARβ2* (18) in UGS samples than cancer tissues: *APC*  
 341 (7) and *RARβ2* (13); whereas promoter methylation was lower for *RASSF1A* (15) in UGS  
 342 than for *RASSF1A* (17) in cancer tissue. The number of samples with promoter methylation  
 343 for *TIMP3* was the same (8), for both UGS and cancer tissues (Table 2).

344 **Table 2: Promoter methylation of *APC*, *RARβ2*, *RASSF1A* and *TIMP3* genes in schistosomiasis and**  
 345 **cancer tissues**

| GENE                  | SAMPLE                |                                                          | Total<br>n(%) |
|-----------------------|-----------------------|----------------------------------------------------------|---------------|
|                       | Cancer Tissue<br>n(%) | <i>Schistosoma haematobium</i><br>Positive Urine<br>n(%) |               |
| <b><i>APC</i></b>     |                       |                                                          |               |
| Methylated            | 7(31.8)               | 24(70.6)                                                 | 31(55.4)      |
| Unmethylated          | 15(68.1)              | 10(29.4)                                                 | 25(44.6)      |
| <b><i>RARβ2</i></b>   |                       |                                                          |               |
| Methylated            | 13(59.1)              | 18(52.9)                                                 | 31(55.4)      |
| Unmethylated          | 9(40.9)               | 16(47.1)                                                 | 25(44.6)      |
| <b><i>RASSF1A</i></b> |                       |                                                          |               |
| Methylated            | 17(77.3)              | 15(44.1)                                                 | 32(57.1)      |
| Unmethylated          | 5(22.7)               | 19(55.9)                                                 | 24(42.9)      |
| <b><i>TIMP3</i></b>   |                       |                                                          |               |
| Methylated            | 8(36.4)               | 8(23.5)                                                  | 16(28.6)      |
| Unmethylated          | 14(63.6)              | 26(76.5)                                                 | 40(71.4)      |

346

347

348

349

350

351



352 In the positive urine samples, *APC*, *RARβ2* and *RASSF1A* were 5-fold, 2-fold and 27-fold  
353 hypermethylated respectively, whereas *TIMP3* had no significant fold change. When  
354 compared to the cancer tissues, *APC* and *RARβ2* were more hypermethylated with a 9-fold  
355 and 3-fold change respectively, *RASSF1A* showed lesser hypermethylation with a 15-fold  
356 change, while *TIMP3* equally had no significant fold change (Figure 2).

357

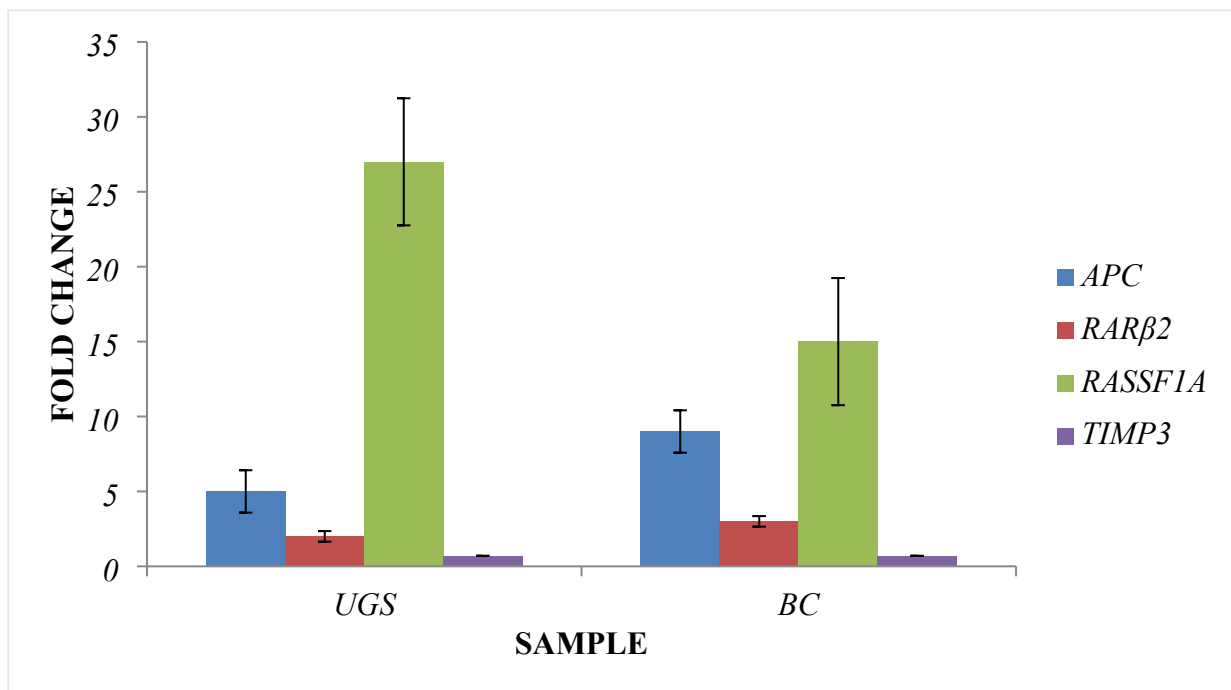

358

359 **Fig 2:** Fold change in promoter methylation of tested genes was highest in *APC* and *RASSF1A*

360

**Legend:** UGS = urogenital schistosomiasis, BC = bladder cancer

361

362

363

364 Pearson's Chi-square test was used to test the association between the promoter methylation  
 365 of the genes of interest and age group, gender, intensity of infection for schistosomiasis  
 366 (Table 3) and age group, gender and histological type for bladder cancer (Table 4).

367 **Table 3: Association of promoter methylation of *APC*, *RARβ2*, *RASSF1A* and *TIMP3* with urogenital schistosomiasis**

| Gene           | Parameters                    | Number Infected | Methylation(%)  | <i>p</i> -value |
|----------------|-------------------------------|-----------------|-----------------|-----------------|
| <i>APC</i>     | <b>Age Group</b>              |                 |                 | 0.555           |
|                | 5 – 10                        | 13              | 9(69.2)         |                 |
|                | 11 – 16                       | 21              | 15(71.4)        |                 |
|                | <b>Total</b>                  | <b>34</b>       | <b>24(70.6)</b> |                 |
|                | <b>Sex</b>                    |                 |                 | 0.586           |
|                | Male                          | 17              | 12(70.6)        |                 |
|                | Female                        | 17              | 12(70.6)        |                 |
|                | <b>Total</b>                  | <b>34</b>       | <b>24(70.6)</b> |                 |
|                | <b>Intensity of Infection</b> |                 |                 | <b>0.000*</b>   |
|                | Light                         | 32              | 22(68.8)        |                 |
|                | Heavy                         | 2               | 2(100)          |                 |
| <b>Total</b>   | <b>34</b>                     | <b>24(70.6)</b> |                 |                 |
| <i>RARβ2</i>   | <b>Age Group</b>              |                 |                 | 0.449           |
|                | 6 – 10                        | 13              | 6(46.2)         |                 |
|                | 11 – 16                       | 21              | 12(57.1)        |                 |
|                | <b>Total</b>                  | <b>34</b>       | <b>18(52.9)</b> |                 |
|                | <b>Sex</b>                    |                 |                 | 0.309           |
|                | Male                          | 17              | 8(47.1)         |                 |
|                | Female                        | 17              | 10(58.8)        |                 |
|                | <b>Total</b>                  | <b>34</b>       | <b>18(52.9)</b> |                 |
|                | <b>Intensity of Infection</b> |                 |                 | <b>0.001*</b>   |
|                | Light                         | 32              | 17(53.1)        |                 |
|                | Heavy                         | 2               | 1(50.0)         |                 |
| <b>Total</b>   | <b>34</b>                     | <b>18(52.9)</b> |                 |                 |
| <i>RASSF1A</i> | <b>Age Group</b>              |                 |                 | 0.495           |
|                | 6 – 10                        | 13              | 5(38.5)         |                 |
|                | 11 – 16                       | 21              | 10(47.6)        |                 |
|                | <b>Total</b>                  | <b>34</b>       | <b>15(44.1)</b> |                 |
|                | <b>Sex</b>                    |                 |                 | 0.542           |
|                | Male                          | 17              | 7(41.2)         |                 |
|                | Female                        | 17              | 8(47.1)         |                 |
|                | <b>Total</b>                  | <b>34</b>       | <b>15(44.1)</b> |                 |
|                | <b>Intensity of Infection</b> |                 |                 | <b>0.010*</b>   |
|                | Light                         | 32              | 15(48.9)        |                 |
|                | Heavy                         | 2               | 0               |                 |
| <b>Total</b>   | <b>34</b>                     | <b>15(44.1)</b> |                 |                 |
| <i>TIMP3</i>   | <b>Age Group</b>              |                 |                 | 0.256           |
|                | 6 – 10                        | 13              | 2(15.4)         |                 |
|                | 11 – 16                       | 21              | 6(28.6)         |                 |
|                | <b>Total</b>                  | <b>34</b>       | <b>8(23.5)</b>  |                 |
|                | <b>Sex</b>                    |                 |                 | 0.256           |
|                | Male                          | 17              | 6(35.3)         |                 |
|                | Female                        | 17              | 2(11.8)         |                 |
|                | <b>Total</b>                  | <b>34</b>       | <b>8(23.5)</b>  |                 |
|                | <b>Intensity of Infection</b> |                 |                 | 0.127           |
|                | Light                         | 32              | 8(25.0)         |                 |
|                | Heavy                         | 2               | 0               |                 |
| <b>Total</b>   | <b>34</b>                     | <b>8(23.5)</b>  |                 |                 |

\*Significant at  $p \leq 0.05$

432

433

434 **Table 4: Association between promoter methylation of *APC*, *RARβ2*, *RASSF1A* and *TIMP3* and BC**

| Gene | Parameters               | Number Infected | Methylation(%)  | <i>p</i> -value |
|------|--------------------------|-----------------|-----------------|-----------------|
| 435  | <i>APC</i>               |                 |                 |                 |
| 436  | <b>Age Group</b>         |                 |                 | 0.194           |
| 437  | <55                      | 7               | 2(28.6)         |                 |
| 438  | ≥55                      | 9               | 2(22.2)         |                 |
| 439  | Missing data             | 6               | 3(50.0)         |                 |
| 440  | <b>Total</b>             | <b>22</b>       | <b>7(31.8)</b>  |                 |
| 441  |                          |                 |                 |                 |
| 442  | <b>Sex</b>               |                 |                 | 0.706           |
| 443  | Male                     | 12              | 3(25.0)         |                 |
| 444  | Female                   | 5               | 1(20.0)         |                 |
| 445  | Missing data             | 5               | 3(60.0)         |                 |
| 446  | <b>Total</b>             | <b>22</b>       | <b>7(31.8)</b>  |                 |
| 447  |                          |                 |                 |                 |
| 448  | <b>Histological Type</b> |                 |                 |                 |
| 449  | <b>0.042*</b>            |                 |                 |                 |
| 450  | UC                       | 13              | 5(38.5)         |                 |
| 451  | Invasive UC              | 3               | 1(33.3)         |                 |
| 452  | Papillary UC             | 1               | 1(100)          |                 |
| 453  | Invasive Papillary UC    | 2               | 0               |                 |
| 454  | Invasive SCC             | 2               | 0               |                 |
| 455  | Invasive Adenocarcinoma  | 1               | 0               |                 |
| 456  | <b>Total</b>             | <b>22</b>       | <b>7(31.8)</b>  |                 |
| 457  | <i>RARβ2</i>             |                 |                 |                 |
| 458  | <b>Age Group</b>         |                 |                 |                 |
| 459  | <b>0.012*</b>            |                 |                 |                 |
| 460  | <55                      | 7               | 4(57.1)         |                 |
| 461  | ≥55                      | 9               | 4(44.4)         |                 |
| 462  | Missing data             | 6               | 5(83.3)         |                 |
| 463  | <b>Total</b>             | <b>22</b>       | <b>13(59.1)</b> |                 |
| 464  |                          |                 |                 |                 |
| 465  | <b>Sex</b>               |                 |                 | 1.000           |
| 466  | Male                     | 12              | 6(50.0)         |                 |
| 467  | Female                   | 5               | 3(60.0)         |                 |
| 468  | Missing data             | 5               | 4(80.0)         |                 |
| 469  | <b>Total</b>             | <b>22</b>       | <b>13(59.1)</b> |                 |
| 470  |                          |                 |                 |                 |
| 471  | <b>Histological Type</b> |                 |                 |                 |
| 472  | <b>0.000*</b>            |                 |                 |                 |
| 473  | UC                       | 13              | 10(76.9)        |                 |
| 474  | Invasive UC              | 3               | 0               |                 |
| 475  | Papillary UC             | 1               | 0               |                 |
| 476  | Invasive Papillary UC    | 2               | 2(100)          |                 |
| 477  | Invasive SCC             | 2               | 1(50.0)         |                 |
| 478  | Invasive Adenocarcinoma  | 1               | 0               |                 |
| 479  | <b>Total</b>             | <b>22</b>       | <b>13(59.1)</b> |                 |
| 480  | <i>RASSF1A</i>           |                 |                 |                 |
| 481  | <b>Age Group</b>         |                 |                 |                 |
| 482  | <b>0.000*</b>            |                 |                 |                 |
| 483  | <55                      | 7               | 6(85.7)         |                 |
| 484  | ≥55                      | 9               | 7(77.8)         |                 |
| 485  | Missing data             | 6               | 4(66.7)         |                 |
| 486  | <b>Total</b>             | <b>22</b>       | <b>17(77.3)</b> |                 |
| 487  |                          |                 |                 |                 |
| 488  | <b>Sex</b>               |                 |                 | 0.801           |
| 489  | Male                     | 12              | 9(75.0)         |                 |
| 490  | Female                   | 5               | 4(80.0)         |                 |
| 491  | Missing data             | 5               | 4(80.0)         |                 |
| 492  | <b>Total</b>             | <b>22</b>       | <b>17(77.3)</b> |                 |
| 493  |                          |                 |                 |                 |
| 494  | <b>Histological Type</b> |                 |                 |                 |
| 495  | <b>0.000*</b>            |                 |                 |                 |
| 496  | UC                       | 13              | 11(84.6)        |                 |
| 497  | Invasive UC              | 3               | 2(66.7)         |                 |
| 498  | Papillary UC             | 1               | 1(100)          |                 |
| 499  | Invasive Papillary UC    | 2               | 1(50.0)         |                 |
| 500  | Invasive SCC             | 2               | 1(50.0)         |                 |
| 501  | Invasive Adenocarcinoma  | 1               | 1(100)          |                 |
| 502  | <b>Total</b>             | <b>22</b>       | <b>17(77.3)</b> |                 |

\*Significant at  $p \leq 0.05$ , UC = urothelial carcinoma, SCC = squamous cell carcinoma

503  
504

505

506 **Table 4: Association between promoter methylation of *APC*, *RARβ2*, *RASSF1A* and *TIMP3* and BC Cont.**

| Gene | Parameters               | Number Infected | Methylation(%) | <i>p-value</i> |
|------|--------------------------|-----------------|----------------|----------------|
| 507  | <b><i>TIMP3</i></b>      |                 |                |                |
| 508  | <b>Age Group</b>         |                 |                |                |
| 509  | <b>0.015*</b>            |                 |                |                |
| 510  | <55                      | 7               | 4(57.1)        |                |
| 511  | ≥55                      | 9               | 2(22.2)        |                |
| 512  | Missing data             | 6               | 2(33.3)        |                |
| 513  | <b>Total</b>             | <b>22</b>       | <b>8(36.4)</b> |                |
| 514  |                          |                 |                |                |
| 515  | <b>Sex</b>               |                 |                |                |
| 516  | 1.000                    |                 |                |                |
| 517  | Male                     | 12              | 4(33.3)        |                |
| 518  | Female                   | 5               | 2(40.0)        |                |
| 519  | Missing data             | 5               | 2(40.0)        |                |
| 520  | <b>Total</b>             | <b>22</b>       | <b>8(36.4)</b> |                |
| 521  |                          |                 |                |                |
| 522  | <b>Histological Type</b> |                 |                |                |
| 523  | <b>0.052*</b>            |                 |                |                |
| 524  | UC                       | 13              | 5(38.5)        |                |
| 525  | Invasive UC              | 3               | 1(33.3)        |                |
| 526  | Papillary UC             | 1               | 1(100)         |                |
| 527  | Invasive Papillary UC    | 2               | 1(50.0)        |                |
| 528  | Invasive SCC             | 2               | 0              |                |
| 529  | Invasive Adenocarcinoma  | 1               | 0              |                |
| 530  | <b>Total</b>             | <b>22</b>       | <b>8(36.4)</b> |                |

\*Significant at  $p \leq 0.05$ , UC = urothelial carcinoma, SCC = squamous cell carcinoma

531

532 As shown in Table 3 and Figure 3, majority of the participants with urogenital  
 533 schistosomiasis belong to the age group 11 – 16 years and this group also accounted for the  
 534 highest number of promoter methylation of the tested genes, but there was no association  
 535 between age and promoter methylation ( $p > 0.05$ ). Although majority of bladder cancer  
 536 patients belonged to the age group  $\geq 55$  years, but the age group  $< 55$  had highest frequency of  
 537 promoter methylation of the tested genes. There was a significant association between age of  
 538 bladder cancer patients and promoter methylation of tested genes except *APC* at  $p < 0.05$   
 539 (Table 4).

540

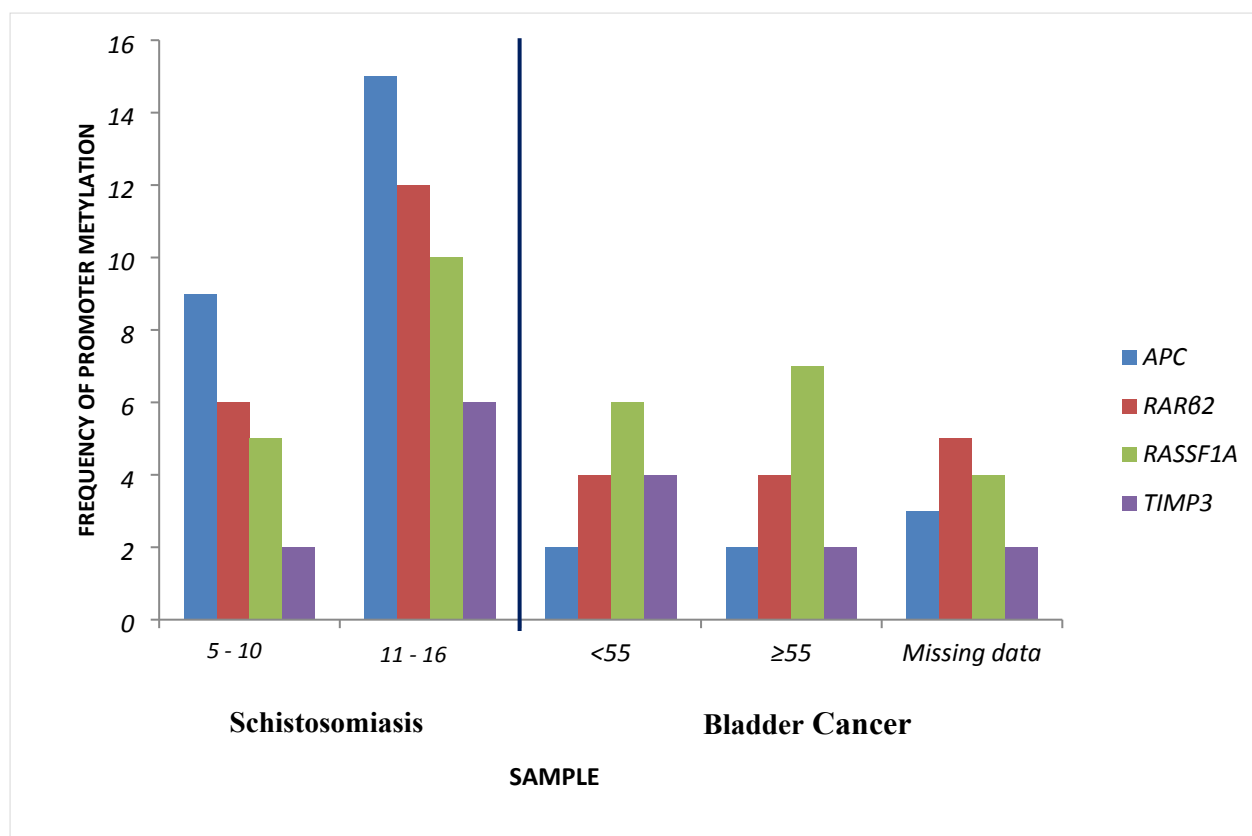

541

542 **Fig 3:** No association between promoter hypermethylation of *APC*, *RARβ2*, *RASSF1A* and *TIMP3* and  
 543 age

544

545 As shown in Table 1, equal numbers of male and female children were infected with  
 546 *Schistosoma haematobium*. While females had the highest promoter hypermethylation for  
 547 *RARβ2* and *RASSF1A*, males had highest promoter hypermethylation in *TIMP3* and both had  
 548 equal number of promoter hypermethylation for *APC* (Table 3). There was no association  
 549 between sex and promoter methylation in children with schistosomiasis ( $p>0.05$ ). In the case  
 550 of bladder cancer tissues used, more males than females had bladder cancer and males also  
 551 had the highest number of promoter methylation for all tested genes, but there was  
 552 association between sex and promoter methylation  $p>0.05$  (Table 4).

553 Intensity of infection was associated with promoter methylation for only *APC*, *RARβ2* and  
 554 *RASSF1A* at  $p<0.05$  (Table 3). For bladder cancer, histological type was also associated with  
 555 promoter methylation for all tested genes at  $p\leq 0.05$  (Table 4).

556 Odds ratio was used to predict if intensity of infection was associated with gene promoter  
557 hypermethylation. Our results showed that promoter hypermethylation was more likely even  
558 at light infection for *RARβ2* (Table 5). Receiver Operating Characteristic (ROC) curve was  
559 generated to assess the ability of the assay to predict promoter methylation. The ROC  
560 analysis for *APC* had sensitivity, specificity and area under curve (AUC) of 55.4%, 75% and  
561 0.908 respectively (Figure 4). The ROC analysis for *RARβ2*, *RASSF1A*, and *TIMP3* are  
562 shown in appendix figures IV, V, and VI respectively. The ROC analysis for all tested genes  
563 had a p-value of  $p < 0.001$ .

564 **Table 5 Association between intensity of infection and promoter methylation of *APC*, *RARβ2*,**  
565 ***RASSF1A* and *TIMP3***

| Parameter                               | Gene           | OR    | 95%CI        |
|-----------------------------------------|----------------|-------|--------------|
| Intensity of infection<br>(Light/Heavy) | <i>APC</i>     | .688  | .544 - .868  |
|                                         | <i>RARβ2</i>   | 1.133 | .065 – 19.74 |
|                                         | <i>RASSF1A</i> | .531  | .384 - .736  |
|                                         | <i>TIMP3</i>   | .750  | .614 - .916  |

571

572

573

574

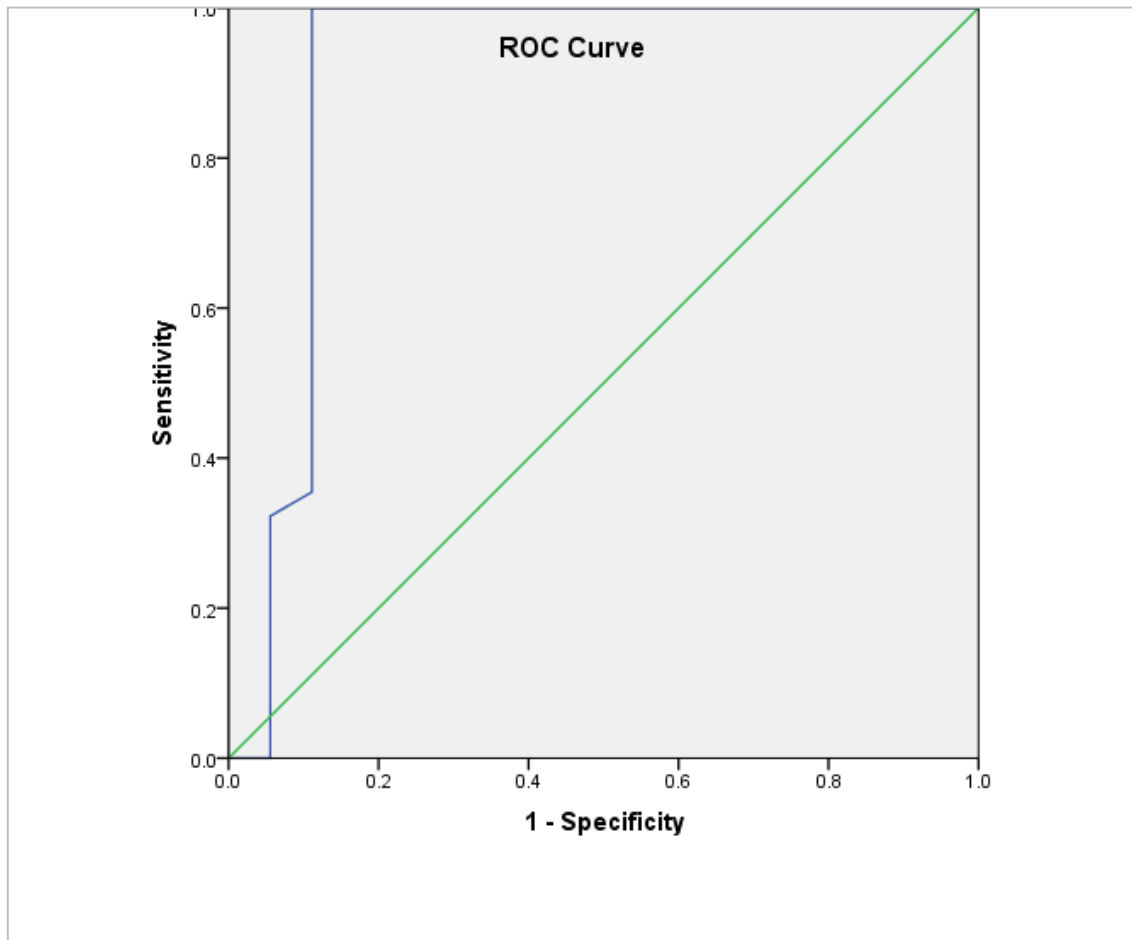

575

576

577

578

**Fig 4:** AUC-ROC Curve for assessing promoter methylation of *APC* (sensitivity = 55.4%, specificity = 75%,  $p < 0.001$ , AUC = 0.908)

## 579 Discussion

580 Altered DNA methylation patterns can inform, (and have been used) in the diagnosis,

581 prognosis, treatment and management of different cancers and other diseases and disorders

582 [18]. *Schistosoma haematobium* the causative agent of schistosomiasis, a neglected tropical

583 disease, is a designated Class I carcinogen and implicated in SABC. Although its mechanism

584 of action is still debatable, it is believed that *S. haematobium* induces bladder cancer over

585 time via chronic inflammation. Schistosomiasis associated bladder cancer usually presents

586 late and has poor prognosis.

587 In this study, we proposed that since DNA methylation is elicited by chronic inflammation  
588 which is believed to mark the initiation phase of cancers, assessing DNA methylation patterns  
589 during active chronic infection in children may hint at the risk of developing SABC at a later  
590 stage in life, and provide the basis for early intervention. In the present study, data are  
591 presented which showed hypermethylation in the promoter region of tumour suppressor  
592 genes. These may suggest that events leading up to SABC begins during active infection in  
593 children. This can be used to distinguish between cases and non-cases, and identify  
594 individuals at risk of developing SABC later in life.

### 595 **Epidemiology of Schistosomiasis in the Study Area**

596 The overall prevalence of urogenital schistosomiasis in this study was 21.1%. This is lower  
597 than 30.8% reported for children in the same area by Oladele *et al.* [19]. Meanwhile,  
598 Alexander *et al.* [5] reported a lower prevalence of 14% in children in other areas of Ogun  
599 State. The low prevalence of urogenital schistosomiasis recorded in this study may be a result  
600 of the ongoing mass drug administration in Ogun State. It is reported that at least once a year  
601 since 2017, pupils in the state are treated with praziquantel depending on the availability of  
602 the drugs [5].

603 Opara *et al.* [20] reported equal chances of males and females being infected with the  
604 parasite. This corroborates the observations in the present study, with equal number (17) of  
605 males (21.8%) and females (20.5%) infected with *S. haematobium*. This is however at  
606 variance with other reports that observed high infection in males than females [3] and in  
607 females than in males [5]. This has been attributed with the socio-cultural practices of the  
608 study areas, as well as how frequent individuals get in contact with cercariae infested water  
609 bodies.



610 Intensity of infection is usually associated with chronicity of disease, clinical manifestations,  
611 morbidities, as well as bladder pathologies. Most of those who were schistosomiasis positive  
612 had only light infection, as has consistently been seen in this area [11] and other parts of the  
613 country [5, 20]. Conversely, reports from other parts of Nigeria [10] and Ghana [21] found  
614 that majority of participants had heavy infection ( $\geq 50$  eggs/10mL urine). Only two  
615 participants had heavy infections in this study, which is similar to the report of Alexander *et*  
616 *al.* [5].

### 617 **Hypermethylation of Gene Promoter Region in UGS during Childhood and UBC**

618 In the current study, the promoter region of *APC*, *RAR $\beta$ 2*, *RASSF1A* and *TIMP3* were  
619 hypermethylated in 31(55.4%), 31(55.4%), 32(57.1%) and 16(28.6%) of all the samples  
620 analyzed respectively. Of this, the promoter regions of *APC*, *RAR $\beta$ 2*, *RASSF1A* and *TIMP3*  
621 were hypermethylated in 24, 18, 15 and 8 respectively of the schistosomiasis positive  
622 samples, whereas they were hypermethylated in 7, 13, 17 and 8 respectively of the bladder  
623 cancer tissues. The observations of the current study shows that schistosomiasis in children  
624 may induce DNA methylation in the target genes due to chronic inflammation. Egg  
625 deposition in tissues usually corresponds with inflammatory response. With the observation  
626 of eggs in urine of infected children in this study, it can be suggested that chronic  
627 inflammation was taking place and may be the reason for the hypermethylation of the target  
628 genes.

629 To ascertain that the target genes are markers for bladder cancer, we tested for promoter  
630 region hypermethylation of the target genes in bladder cancer tissues. Our observations  
631 showed marked promoter hypermethylation in the target genes, and supports our observation  
632 of the same promoter hypermethylation in childhood schistosomiasis. This implies that these  
633 genes are markers for bladder cancer. The reports that cancer-specific DNA methylation can  
634 occur more than ten years before diagnosis of neoplasm [12] also supports the observation of

635 DNA methylation in children with schistosomiasis in the current study, and may imply that  
636 events leading up to SABC at a later stage in life may begin years before diagnosis. This is in  
637 addition to the fact that altered DNA methylation pattern is associated with the initiation  
638 phase of cancer or precedes tumorigenesis [22].

639 Furthermore, there was a significant association between the histological type of the bladder  
640 cancer tissues and promoter DNA methylation in *APC* ( $p < 0.005$ ), *RARβ2* ( $p < 0.001$ ),  
641 *RASSF1A* ( $p < 0.05$ ) and *TIMP3* ( $p = 0.05$ ). This implies that DNA methylation of the  
642 promoter region of tumour suppressor genes and other genes involved in cell cycle regulation  
643 and apoptosis are pre-malignant events that may occur in bladder cancer. This is similar to  
644 the report of Zaghloul *et al.* [1], which found DNA methylation of promoter region of these  
645 genes and hence suggested their implications for bladder cancer.

#### 646 **DNA methylation in Childhood Schistosomiasis**

647 In the current study, it was observed that *APC*, *RARβ2* and *RASSF1A* were 5 times, 2 times  
648 and 27 times hypermethylated respectively in schistosomiasis positive samples. This was  
649 similarly observed in the invasive bladder cancer tissues with a 9-fold, 3-fold and 15-fold  
650 hypermethylation for *APC*, *RARβ2* and *RASSF1A* respectively. The presence of DNA  
651 methylation in non-tumor urine cells in this study, validated by those in the invasive bladder  
652 cancer tissues, may suggest the presence of an “epigenetic field defect”.

653 Kim and Kim, [22] reports that normal-appearing tissues taken at least 5cm away from  
654 invasive tumours had 169 hypermethylated loci; out of which 142 loci were the same as those  
655 seen in the invasive tumours. This they described as an “epigenetic field defect”, meaning  
656 that methylation was already present before initiation of tumorigenesis. Furthermore, the  
657 findings of the present study indicate that *S. haematobium* can effectively induce DNA  
658 methylation in non-cancerous exfoliated cells. This is similar to the report of Nakajima *et al.*

659 [23], that *Helicobacter pylori* can effectively induce aberrant DNA methylation in non-  
660 cancerous gastric mucosae.

661 The concept of “field of cancerization” was first reported when it was observed that  
662 metachronous primary cancers developed further, even after curative resection in oral cavity  
663 cancer [24]. The presence of “epigenetic field defect” may contribute to what is referred to as  
664 an “epigenetic field of cancerization”. This implies that aberrant DNA methylation in non-  
665 tumour cells may suggest the role of the former in the epigenetic field of cancerization [23].  
666 Therefore, the observations of promoter hypermethylation of tumour suppressor genes in the  
667 present study may hint that during schistosomiasis in children, DNA methylation alterations  
668 occur, forming an epigenetic field of cancerization which may over time progress to SABC.

669 The observations of the current study show that the highest number of promoter methylation  
670 of the tested genes occurred in children with schistosomiasis in the age group 11-16 years old  
671 (Figure 2; Table 3). This may be due to the fact that schistosomiasis infection peaks at  
672 adolescence [10], and synchronizes with time when chronic inflammation, restorative  
673 hyperplasia, squamous cell metaplasia and DNA lesions may be high [21]. Although there  
674 was no association between age and promoter region hypermethylation, these results suggests  
675 that DNA methylation events and pre-cancerous lesions may begin during active  
676 schistosomiasis infection in childhood.

677 In this study, there was no association between gender and promoter hypermethylation for  
678 tested genes in schistosomiasis positive samples, implying that DNA methylation of promoter  
679 region of the tested genes were independent of gender. On the other hand, more males than  
680 females had DNA methylation of promoter region of the tested genes in the bladder cancer  
681 tissues. This was significant and implied an association between gender and bladder cancer.  
682 This may explain why more males than females have bladder cancer [25].

683 The intensity of infection in this study was significantly associated with promoter DNA  
684 hypermethylation of *APC* ( $p < 0.001$ ), *RARβ2* ( $p = 0.001$ ) and *RASSF1A* ( $p < 0.05$ ). There was  
685 no association between intensity of infection and *TIMP3* ( $p = 0.127$ ). This is similar to a  
686 report of association between light intensity and bladder pathologies in adults [11]. Therefore,  
687 even in light infections, chronic disease can still occur leading to epigenetic alterations like  
688 DNA methylation which may be easily observed than mutations, and precede cytological  
689 abnormalities, morbidities, bladder pathologies and the risk of malignant transformation later  
690 in life.

691 Odds ratio was used to predict the risk of gene promoter hypermethylation in relation to the  
692 intensity of infection. Our results showed that the gene promoter of *RARβ2* was more likely  
693 to be hypermethylated even at light infection, whereas the gene promoter of *APC*, *RASSF1A*  
694 and *TIMP3* were less likely to be methylated at light infection, but in heavy infections. Based  
695 on these observations, it can be said that once infection with *S. haematobium* is established,  
696 gene promoter methylation will occur. Therefore, it could be suggested that since DNA  
697 methylation occurs before or marks the onset of future malignant transformation, childhood  
698 schistosomiasis marks the beginning of events leading up to SABC.

699 The ROC-AUC analysis could be used for routine screening purposes, to ascertain DNA  
700 methylation of promoter region of target genes in infected children and to discriminate  
701 between cases and non-cases. It could be used to assess DNA methylation fingerprints in  
702 individuals who may have had prior infection that have been treated or showing  
703 symptoms/morbidity markers of bladder pathologies/cancer. This may help identify  
704 individuals at risk of malignant transformation at a later stage in life.

705

706 **Possible link between childhood UGS and the risk of developing SABC at a later stage**  
707 **in life**

708 It is known that children under the age of 18 years are the most susceptible group to  
709 schistosomiasis infection, and this may be as result of children having a naïve immune  
710 system [26]. Infection is highest in children from 5 years old and peaks in adolescents of age  
711 between 15 and 18 years [3]. This may explain why there are usually less obvious events that  
712 may indicate active infection after adolescence, giving rise to a “concomitant immunity” with  
713 a balanced host-parasite inter-relationship that keeps both alive and establishing a reduced  
714 parasite’s fertility, limited patient morbidity and resistance to re-infection [4].

715 Furthermore, it has been established that DNA methylation had occurred in pre-diagnostic  
716 blood collected more than 10 years before diagnosis of chronic lymphocytic leukemia [12].  
717 Moreover, the role of epigenetic alterations appears to not only be limited to cancers, and  
718 there is even a greater possibility that “epigenetic field defect” may play a part in, and be  
719 identified for various diseases [23].

720 Based on the above observations and the presence of an “epigenetic field defect” in the  
721 current study; it can be suggested that DNA methylation (which marks the initiation phase of  
722 cancers) begins during active schistosomiasis infection in children under the age of 18 years  
723 old. According to Nakajima *et al.* [23], measuring disease risk at a time point using DNA  
724 methylation marker will aid individuals change their lifestyles especially for close intensive  
725 disease prevention. Therefore, the results of the current study suggest that the epigenetic  
726 alterations occurring during childhood schistosomiasis may be the link to SABC at a later  
727 stage in life.

728 These observations imply that early events of DNA methylation of promoter region of  
729 tumour suppressor genes (*APC*, *RARβ2* and *RASSF1A*) and *TIMP3*; involved in apoptosis,

730 observed in this study may occur during active infections of *S. haematobium* in childhood.  
731 These alterations if not repaired or incompletely repaired, may be replicated and passed on  
732 from one generation of cells to another. This may lead to transformation of cells due to  
733 inability of cells to repair damaged cells, as seen in urothelial hyperplasia and squamous cell  
734 metaplasia in urine of children with active infection [21]. Urothelial hyperplasia and  
735 squamous metaplasia, are themselves potential preneoplastic lesions of the bladder.  
736 Subsequently, it may promote the propagation of cells harbouring genotoxic DNA damage  
737 and with just a matter of time and further genotoxic damage, before a potential cancer occurs  
738 [27].

739 Thus, hypermethylated genes during childhood infections may be maintained and carried  
740 from one generation of cell to another, until infection peaks in late adolescence. At this point,  
741 granulomas may have accumulated and gradually replaced by restorative hyperplasia. This  
742 may explain why children with UGS have mild bladder pathologies such as thickness of  
743 bladder wall and irregularities [28]. These are silent events that are almost not observable and  
744 may serve as the link or bridge between chronic UGS in childhood and SABC in later age.

745 The occurrence of hypermethylation of tumour suppressor genes as seen in the present study  
746 is not conclusive that there will be development of cancer. Rather, if disease is left untreated  
747 in childhood, there is a higher risk of cancer development in later age. It is evident that  
748 epigenetic changes are reversible, therefore DNA methylation induced by schistosomiasis  
749 may be reversed if detected early, thus preventing progression or development of disease  
750 and/or cancer. Tetteh-Quarcoo *et al.* [29], reports post-praziquantel treatment reversal of  
751 cytological abnormalities such as the reversal of transitional metaplastic squamous cells to  
752 normal cells after 3-8 weeks in children. Drugs such as DNA methylase inhibitor or histone  
753 deacetylase inhibitors are known to restore the activity of suppressed genes.

754 Therefore, early detection and drugs targeted at reversal of epigenetic changes are areas of  
755 research interest. More studies are needed to validate the observations from the present study,  
756 especially to check if there is an association between DNA methylation and bladder  
757 pathology not just in children with active infection, but adults who may have had  
758 schistosomiasis as children or presenting with morbidity markers. Furthermore, this study is  
759 limited by the small size. Hence, the need for a large sample size or cohort studies.

760 This is important because *S. haematobium* may leave behind fingerprints of DNA damage  
761 like DNA methylation which may induce carcinogenesis later in life. Some carcinogenic  
762 factors are known to leave their fingerprint such as specific DNA methylation patterns in the  
763 tissues they damage even if they are no longer present or eradicated, for example *H. pylori*.  
764 Moreover, DiNardo *et al.* [30] reports that schistosomiasis-induced CD4+ T cells DNA  
765 methylation signature persisted at least 6 months after successful deworming for  
766 schistosomiasis. This indicates the continued effect of schistosome infections even after  
767 treatment, and is consistent with observations that the pathologies associated with  
768 schistosomiasis persists beyond infection [31].

769 Although it is a schistosomiasis endemic area, it is noteworthy that SABC has not been  
770 reported in Eggua community. Although this claim has not been fully verified, there might be  
771 few explanations for it. First, as infected individuals grow, they acquire effective immunity to  
772 the parasite insult, which may aid in adequate moderation of immune response to the  
773 infection. Malignant transformation is usually a result of poorly regulated infection which  
774 may lead to fibrosis and SABC. Secondly, during childhood, abnormal cells may have  
775 resolved either by themselves or these individuals may have had treatment for the infection.  
776 This can be explained by the fact that transitional squamous metaplastic cells are known to  
777 resolve with time in children, especially post-praziquantel treatment [29].

778 Finally, schistosomiasis usually works together with other factors like environmental  
779 carcinogens and mutagens to induce bladder cancer [32]. Therefore, these individuals may  
780 not be at risk of persistent exposure to these genotoxins at levels high enough to elicit  
781 malignant transformation. Nevertheless, further studies are needed to verify these assertions.

## 782 **CONCLUSION**

783 The present study has shown that gene promoter region DNA methylation of tumour  
784 suppressor genes will occur once *Schistosoma haematobium* infection is established  
785 especially in the most vulnerable group (children). The observation of an “epigenetic field of  
786 cancerization” in this study could be used as a molecular biomarker to identify individuals at  
787 risk of malignant transformation in later age. Based on the presence of an “epigenetic field of  
788 cancerization”, it can be suggested that the journey to malignant transformation begins during  
789 active infection in childhood, especially if disease is left untreated. Therefore individuals,  
790 especially children living in schistosomiasis endemic areas should be given adequate public  
791 health attention through adequate diagnosis, mass drug administration, routine follow-up and  
792 means of avoiding contact with infested water bodies.

## 793 **References**

794 Zaghoul MS, Zaghoul TM, Bishr MK, Baumann, BC. Urinary schistosomiasis and the  
795 associated bladder cancer: update. J Egypt. Nat. Cancer Inst. 2020;32: 44.

796 World Health Organization, WHO. 2022. Available from  
797 <https://www.who.int/newsroom/factsheets/detail/schistosomiasis>.

798 Verjee MA. Schistosomiasis: Still a Cause of Significant Morbidity and Mortality. Res Rep  
799 Trop Med 2019;10: 153-163.



- 800 Barsoum RS, Esmat G, El-Baz, T. Human Schistosomiasis: Clinical Perspective: Review. J.  
801 Adv. Res. 2013;4: 433–444.
- 802 Alexander SI, Nwafor TS, Gyang PV, Idowu ET, Akinwale OP. Prevalence of Urogenital  
803 Schistosomiasis and its Implication on Control Efforts Among School Pupils in Ogun State,  
804 Southwest Nigeria. PAJOLS. 2021;5:3: 335-341.
- 805 Eissa S, Matboli M, Shawky S, Essawy NOE. Urine biomarkers of schistosomiasis and its  
806 associated bladder cancer. Expert Rev. Anti Infect. Ther. 2015;13:8: 985–993.
- 807 Bestor TH. The DNA methyltransferases of mammals. *Human Molec Genet*; 2000;9: 2395–  
808 2402.
- 809 Martisova A, Holcakova J, Izadi N, Sebuyoya R, Hrstka R, Bartosik M. DNA Methylation in  
810 Solid Tumors: Functions and Methods of Detection. *Int J Mol Sci*. 2021;22:8: 4247
- 811 Djomkam Zune AL, Olwal CO, Tapela K, Owoicho O, Nganyewo NN, Lyko F, et al.  
812 Pathogen-Induced Epigenetic Modifications in Cancers: Implications for Prevention,  
813 Detection and Treatment of Cancers in Africa. *Cancers* 2021;13: 6051.
- 814 Jiya FB, Jiya NM, Ibitoye PK, Mohammed Y, Mohammad AU. Chronic Urogenital  
815 Schistosomiasis among In-School Adolescents in Sokoto, North-Western Nigeria. *AJMAH*.  
816 2022;20:1: 22-36.
- 817 Onile OS, Awobode HO, Oladele VS, Agunloye AM, Anumudu, CI (2016). Detection of  
818 Urinary Tract Pathology in Some *Schistosoma haematobium* Infected Nigerian Adults. *J Trop*  
819 *Med*. Volume 2016, Article ID 5405207, 5 pages.
- 820 Loi E, Moi L, Fadda A, Satta G, Zucca M, Sanna S, et al. Methylation alteration of SHANK1  
821 as a predictive, diagnostic and prognostic biomarker for chronic lymphocytic leukemia.  
822 *Oncotarget*. 2019;10:48: 4987–5002.

- 823 Adebayo AS, Mundhe SD, Awobode HO, Onile OS, Agunloye AM, et al. Metabolite  
824 profiling for biomarkers in *Schistosoma haematobium* infection and associated bladder  
825 pathologies. *PLoS Negl Trop Dis*. 2018;12: 4.
- 826 Charan J, Biswas T. How to Calculate Sample Size for Different Study Designs in Medical  
827 Research? *Indian J Psychol Med*. 2013; 35:2: 121-126.
- 828 Adebayo AS, Survayanshi M, Bhute S, Agunloye AM, Isokpehi RD, Anumudu CI, et al. The  
829 microbiome in urogenital schistosomiasis and induced bladder pathologies. *PLoS Negl Trop*  
830 *Dis*. 2017;11(8): e0005826. <https://doi.org/10.1371/journal.pntd.0005826>.
- 831 Sigalotti L, Covre A, Colizzi F, Fratta E. Quantitative Methylation-Specific PCR: A Simple  
832 Method for Studying Epigenetic Modifications of Cell-Free DNA. *Methods mol.*  
833 *biol*. 2019;1909: 137–162.
- 834 Li Y, Tollefsbol TO. DNA methylation detection: Bisulfite genomic sequencing analysis.  
835 *Methods Mol Biol*. 2011;791: 11–21. doi:10.1007/978-1-61779-316-5\_2.
- 836 Cao J, Wu Q, Huang Y, Wang L, Su Z, Ye H. The role of DNA methylation in syndromic  
837 and non-syndromic congenital heart disease. *Clin Epigenetics*. 2021;13:1: 93.
- 838 Oladele VS, Awobode H, Anumudu, CI. Subtle morbidities associated with malaria co-  
839 infection with schistosomiasis among children in South-West Nigeria. *Afr J Med Med Sci*.  
840 2014;43:Suppl, 125 – 135.
- 841 Opara KN, Akomalafe RT, Udoidung NI, Afia UU, Yaro CA, Bassey, BE. Urogenital  
842 Schistosomiasis among Primary School Children in Rural Communities in Obudu, Southern  
843 Nigeria. *Int J MCH AIDS*. 2021;10:1: 70-80.

- 844 Tetteh-Quarcoo PB, Akuetteh BK, Owusu IA, Quayson SE, Attah SK, Armah R, et al.  
845 Cytological and Wet Mount Microscopic Observations Made in Urine of Schistosoma  
846 haematobium-Infected Children: Hint of the Implication in Bladder Cancer. *Can J Infect Dis*  
847 *Med Microbiol.* 2019;7912186. <https://doi.org/10.1155/2019/7912186>.
- 848 Kim YJ, Kim WJ. Can we use methylation markers as diagnostic and prognostic indicators  
849 for bladder cancer? *Investig Clin Urol.* 2016;57 Suppl 1:S77-88.  
850 <http://dx.doi.org/10.4111/icu.2016.57.S1.S77>.
- 851 Nakajima T, Enomoto S, Ushijima T. DNA methylation: a marker for carcinogen exposure  
852 and cancer risk. *Environ Health Prev Med.* 2018;13: 8–15.
- 853 Slaughter DP, Southwick HW, Smejkal W. Field cancerization in oral stratified squamous  
854 epithelium; clinical implications of multicentric origin. *Cancer* 1953;6: 963–8.
- 855 Kibaru J, Kotecha P, Iya AM, et al. Scoping review protocol: bladder cancer in Nigeria: what  
856 are the gaps in clinical care and research? *BMJ Open.* 2021;11: e041894.  
857 doi:10.1136/bmjopen-2020-041894.
- 858 Sekar K, Krishnamurthy S, Mandal J, Rajappa, M. Global DNA Methylation in Children with  
859 Complicated Urinary Tract Infection. *Arch Intern Med Res.* 2020;3: 001-009.
- 860 Vennervald BJ. Epidemiology and Mechanism of Carcinogenesis of Schistosomiasis. *Trop*  
861 *Hem-Onc.* 2015. DOI 10.1007/978-3-319-18257-5\_18.
- 862 Mawa PA, Kincaid-Smith J, Tukahebwa EM, Webster JP, Wilson, S. Schistosomiasis  
863 Morbidity Hotspots: Roles of the Human Host, the Parasite and Their Interface in the  
864 Development of Severe Morbidity. *Front. Immunol.* 2021;12: 635869.

- 865 Tetteh-Quarcoo PB, Ampong A, Dayie NTKD, Ahenkorah J, Udofia EA, Afutu E, et al.  
866 Dynamics in Morbidity Markers and Cytological Observations Made in Urine of Schistosoma  
867 haematobium-Infected Children: Pre and Post-Praziquantel Treatment in an Endemic Setting.  
868 Med. Sci. 2022;10: 14.
- 869 DiNardo AR, Nishiguchi T, Mace EM, Rajapakshe K, Mtetwa G, Kay A, et al.  
870 Schistosomiasis Induces Persistent DNA Methylation and Tuberculosis-Specific Immune  
871 Changes. J Immunol. 2018;201:1: 124-133.
- 872 King, CH. It's time to dispel the myth of “asymptomatic” schistosomiasis. PLoS Negl Trop  
873 Dis. 2015;9: e0003504.
- 874 Ishida K, Hsieh MH. Understanding Urogenital Schistosomiasis-Related Bladder Cancer: An  
875 Update. Front. Med. 2018;5: 223.

876 **Supporting information**

- 877 S1 Table: Primer sequence and qMSP reaction conditions
- 878 S1 Fig. qPCR amplification and melting temperatures for *RARβ2*
- 879 S2 Fig. qPCR amplification and melting temperatures for *RASSF1A*
- 880 S3 Fig. qPCR amplification and melting temperatures for *TIMP3*
- 881 S4 Fig. AUC-ROC Curve for assessing promoter methylation of *RARβ2*
- 882 S5 Fig. AUC-ROC Curve for assessing promoter methylation of *RASSF1A*
- 883 S6 Fig. AUC-ROC Curve for assessing promoter methylation of *TIMP3*
- 884 **Financial disclosure statement:** The authors received no specific funding for this work
